# Supplementary material for: Peak Tibiofemoral Contact Forces Estimated Using IMU-Based Approaches Are Not Significantly Different from Motion Capture-Based Estimations in Patients with Knee Osteoarthritis
Source: MDPI journal article supplement (doi:10.3390/s23094484), 2023-05-04
Supplement: s1 [file s1]

## Supplementary Materials:

**PPCA estimated joint moments (Figure S1):** The customized PPCA KOA-based model showed an average RMSE of the estimated hip flexion, adduction and rotation moment of  $0.15 \pm 0.04$  Nm/kg,  $0.16 \pm 0.04$  Nm/kg and  $0.03 \pm 0.06$  Nm/kg, respectively with  $R^2$  of  $0.77 \pm 0.20$ ,  $0.79 \pm 0.15$  and  $0.59 \pm 0.24$ , respectively. And the average RMSE of the estimated knee flexion and ankle flexion moment of  $0.12 \pm 0.06$  Nm/kg and  $0.15 \pm 0.04$  Nm/kg, respectively with  $R^2$  of  $0.69 \pm 0.15$  and  $0.92 \pm 0.35$ , respectively.

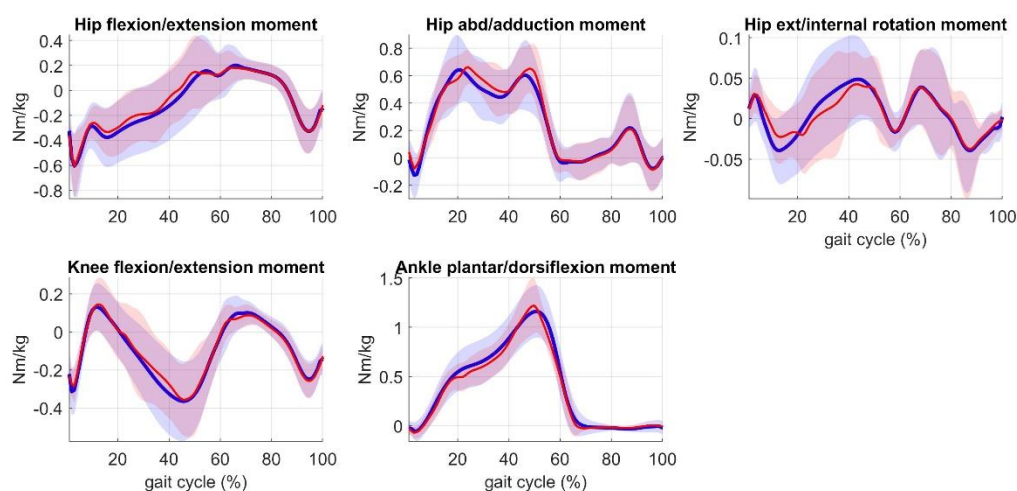

**Figure S1.** MoCap (blue) vs estimated (red) joint moments of the PPCA KOA population-based model.

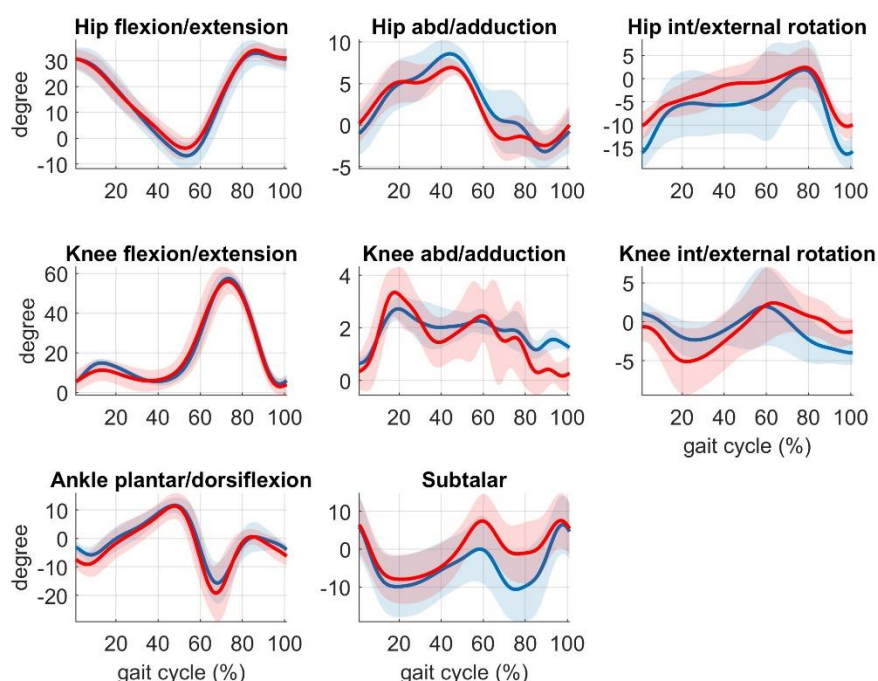

**Figure S2.** MoCap (blue) vs InCap (red) joint kinematics comparison

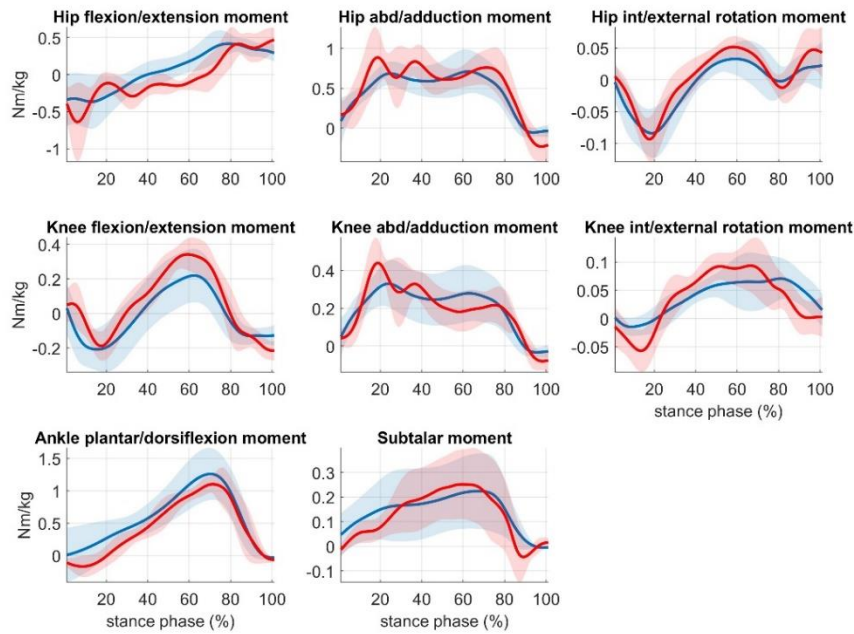

**Figure S3.** MoCap (blue) vs InCap (red) joint moments comparison

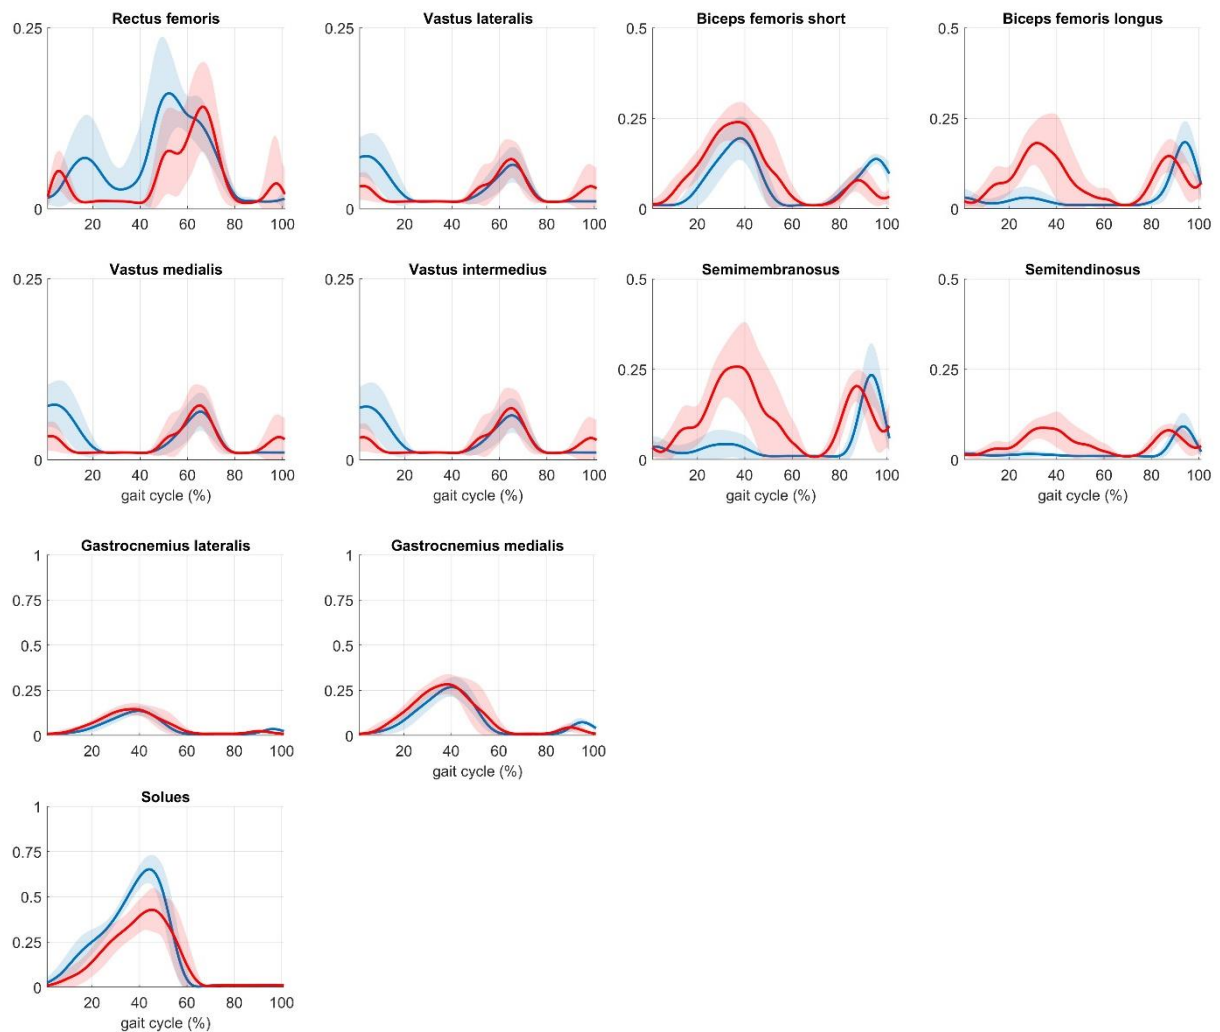

**Figure S4.** MoCap (blue) vs InCap (red) muscle activation comparison (main muscles).

**Table S1.** Root mean square error (RMSE) and coefficient of determination (R2) of joint kinematics, joint moments and muscle activation between MoCap and InCap.

| Joint kinematics           | RMSE (°) |      | R2   |      |
|----------------------------|----------|------|------|------|
|                            | Mean     | Std  | Mean | Std  |
| Hip flexion/extension      | 5.04     | 1.70 | 0.95 | 0.05 |
| Hip abd/adduction          | 1.88     | 0.56 | 0.86 | 0.10 |
| Hip int/external rotation  | 4.73     | 2.50 | 0.83 | 0.21 |
| Knee flexion/extension     | 4.78     | 1.52 | 0.92 | 0.09 |
| Knee abd/adduction         | 1.42     | 0.31 | 0.45 | 0.17 |
| Knee int/external rotation | 4.44     | 1.86 | 0.47 | 0.20 |
| Ankle plantar/dorsiflexion | 5.12     | 1.25 | 0.84 | 0.17 |
| Subtalar                   | 4.80     | 1.36 | 0.70 | 0.13 |

  

| Joint moments              | RMSE (Nm/kg) |      | R2   |      |
|----------------------------|--------------|------|------|------|
|                            | Mean         | Std  | Mean | Std  |
| Hip flexion/extension      | 0.31         | 0.20 | 0.57 | 0.12 |
| Hip abd/adduction          | 0.31         | 0.14 | 0.69 | 0.20 |
| Hip int/external rotation  | 0.03         | 0.01 | 0.73 | 0.12 |
| Knee flexion/extension     | 0.14         | 0.07 | 0.74 | 0.19 |
| Knee abd/adduction         | 0.14         | 0.04 | 0.69 | 0.18 |
| Knee int/external rotation | 0.04         | 0.02 | 0.65 | 0.26 |
| Ankle plantar/dorsiflexion | 0.32         | 0.19 | 0.75 | 0.17 |
| Subtalar                   | 0.16         | 0.08 | 0.52 | 0.31 |

  

| Muscle activation       | RMSE (0-1) |       | R2   |      |
|-------------------------|------------|-------|------|------|
|                         | Mean       | Std   | Mean | Std  |
| Gastrocnemius lateralis | 0.033      | 0.020 | 0.81 | 0.18 |
| Gastrocnemius medialis  | 0.065      | 0.038 | 0.80 | 0.20 |
| Soleus                  | 0.130      | 0.041 | 0.73 | 0.18 |
| Biceps femoris short    | 0.076      | 0.039 | 0.48 | 0.30 |
| Biceps femoris long     | 0.095      | 0.037 | 0.12 | 0.14 |
| Semimembranosus         | 0.141      | 0.054 | 0.12 | 0.11 |
| Semitendinosus          | 0.048      | 0.016 | 0.10 | 0.12 |
| Vastus lateralis        | 0.026      | 0.015 | 0.44 | 0.34 |
| Vastus medialis         | 0.024      | 0.014 | 0.45 | 0.34 |
| Vastus intermedius      | 0.025      | 0.014 | 0.44 | 0.34 |
| Rectus femoris          | 0.064      | 0.029 | 0.33 | 0.25 |

**Table S2.** p and q-value for testing significancy (< 0.05) of differences in Knee contact forces peak and impulse—significant different values in bold.

|         |                | MoCap vs InCap |               |
|---------|----------------|----------------|---------------|
|         |                | p-value        | q-value       |
| Peak 1  | <b>Total</b>   | 0.4623         | 1.6816        |
|         | <b>Medial</b>  | 0.1221         | 0.6218        |
|         | <b>Lateral</b> | 0.1868         | 0.7925        |
| Peak 2  | <b>Total</b>   | 0.0143         | 0.1212        |
|         | <b>Medial</b>  | 0.0316         | 0.2009        |
|         | <b>Lateral</b> | 0.5463         | 1.7388        |
| Impulse | <b>Total</b>   | 0.0020         | <b>0.0252</b> |
|         | <b>Medial</b>  | 0.0010         | <b>0.0252</b> |
|         | <b>Lateral</b> | 0.8799         | 2.4894        |
